# Supplementary material for: The effect of resveratrol on the cryopreservation of Mongolian horse semen
Source: Copernicus journal article supplement (doi:10.5194/aab-68-27-2025), 2025-01-06
Supplement: Supplementary file 1 [file aab-68-27-2025-supplement.zip]

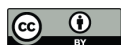

## *Supplement of*

# **The effect of resveratrol on the cryopreservation of Mongolian horse semen**

**Ming Du et al.**

*Correspondence to:* Manglai Dugarjaviin (dmanglai@163.com)

- aab-68-27-2025-supplement-title-page.pdf
- Table S1.xlsx
- Table S2.xlsx
- Table S3.xlsx
- Table S4.xlsx

The copyright of individual parts of the supplement might differ from the article licence.
