# Supplementary material for: The effect of resveratrol on the cryopreservation of Mongolian horse semen
Source: Copernicus journal article supplement (doi:10.5194/aab-68-27-2025), 2025-01-06
Supplement: Supplementary file 1 [file aab-68-27-2025-supplement.zip]

## Sheet: Sheet1
SOD detection
Sample Number	Measured OD Value 1	Measured OD Value 2	Measured OD Value 3	Average OD Value	SOD Inhibition Rate %1	SOD Inhibition Rate %2	SOD Inhibition Rate %3	SOD Activity (U/mL) 1	SOD Activity (U/mL) 2	SOD Activity (U/mL) 3
Control blank	0.044
Control	0.673
Measured blank	0.416
0mol/L	0.669	0.67	0.678	0.672333	3.05263	3.10526	3.52632	73.2632	74.5263	84.6316
10mol/L	0.656	0.65	0.659	0.655	2.31579	2.05263	2.52632	55.5789	49.2632	60.6316
20mol/L	0.631	0.636	0.63	0.632333	1.12281	1.31579	1	26.9474	31.5789	24
30mol/L	0.623	0.622	0.626	0.623667	0.666667	0.578947	0.789474	16	13.8947	18.9474
40mol/L	0.624	0.62	0.616	0.62	0.473684	0.473684	0.263158	11.3684	11.3684	6.31579
50mol/L	0.642	0.639	0.635	0.638667	1.45614	1.47368	1.26316	34.9474	35.3684	30.3158
60mol/L	0.662	0.661	0.656	0.659667	2.5614	2.63158	2.36842	61.4737	63.1579	56.8421
80mol/L	0.653	0.655	0.659	0.655667	2.35088	2.31579	2.52632	56.4211	55.5789	60.6316
100mol/L	0.663	0.658	0.659	0.66	2.57895	2.47368	2.52632	61.8947	59.3684	60.6316
MDA detection
Sample Number	Measured Value 1	Measured Value 2	Measured Value 3	Average Measured Value	Propylene Glycol (MDA) Content (nmol/mL) 1	Propylene Glycol (MDA) Content (nmol/mL) 2	Propylene Glycol (MDA) Content (nmol/mL) 3
Blank	0.045
Standard	0.065
Control	0.051
0mol/L	0.08	0.076	0.077	0.0776667	188.276	189.655	189.31
10mol/L	0.062	0.065	0.064	0.0636667	7	7.5	7
20mol/L	0.067	0.066	0.065	0.066	192.759	193.103	193.448
30mol/L	0.065	0.066	0.065	0.0653333	7.5	7	6.5
40mol/L	0.061	0.062	0.065	0.0626667	6.5	5.5	4.5
50mol/L	0.067	0.065	0.066	0.066	192.759	193.448	193.103
60mol/L	0.065	0.069	0.068	0.0673333	193.448	192.069	192.414
80mol/L	0.069	0.071	0.069	0.0696667	192.069	191.379	192.069
100mol/L	0.072	0.074	0.071	0.0723333	191.034	190.345	191.379
GSH-PX detectiondetection
Sample Number	Enzyme Tube 1	Enzyme Tube 2	Enzyme Tube 3	Average Enzyme Tube	Non-enzyme Tube 1	Non-enzyme Tube 2	Non-enzyme Tube 3	Average Non-enzyme Tube	GSH-PX Activity (Enzyme Activity Unit) 1	GSH-PX Activity (Enzyme Activity Unit) 2	GSH-PX Activity (Enzyme Activity Unit) 3
Blank	0.065
Standard	0.152
0mol/L	0.285	0.284	0.283	0.284	0.292	0.298	0.293	0.294333	-911.063	59.8399	-1301.52
10mol/L	0.291	0.293	0.289	0.291	0.306	0.307	0.311	0.308	-2212.58	73.7759	73.7759
20mol/L	0.264	0.261	0.265	0.263333	0.28	0.284	0.279	0.281	85.7172	91.6478	107.712
30mol/L	0.271	0.263	0.268	0.267333	0.285	0.29	0.286	0.287	97.6852	103.856	135.664
40mol/L	0.261	0.254	0.259	0.258	0.277	0.279	0.281	0.279	137.632	181.368	141.648
50mol/L	0.29	0.288	0.291	0.289667	0.31	0.306	0.305	0.307	93.7225	107.712	83.7759
60mol/L	0.278	0.277	0.275	0.276667	0.29	0.293	0.292	0.291667	79.7599	95.7439	91.7279
80mol/L	0.276	0.277	0.278	0.277	0.291	0.289	0.29	0.29	77.7919	61.8079	71.8079
100mol/L	0.277	0.281	0.279	0.279	0.293	0.291	0.292	0.292	57.7919	83.7759	77.7919
T-AOC detection
Sample Number	Control Tube 1	Control Tube 2	Control Tube 3	Average Control Tube	Measurement Tube 1	Measurement Tube 2	Measurement Tube 3	Average Measurement Tube	Total Antioxidant Capacity (Units/mL of serum) 1	Total Antioxidant Capacity (Units/mL of serum) 2	Total Antioxidant Capacity (Units/mL of serum) 3
0mol/L	0.104	0.1	0.102	0.102	0.109	0.113	0.105	0.109	0.616667	1.60333	0.37
10mol/L	0.085	0.091	0.088	0.088	0.111	0.111	0.108	0.11	3.20667	2.46667	2.46667
20mol/L	0.085	0.086	0.091	0.0873333	0.114	0.106	0.108	0.109333	3.57667	2.46667	2.09667
30mol/L	0.089	0.092	0.091	0.0906667	0.11	0.113	0.117	0.113333	2.59	2.59	3.20667
40mol/L	0.098	0.096	0.099	0.0976667	0.121	0.123	0.117	0.120333	2.83667	3.33	2.22
50mol/L	0.082	0.091	0.091	0.088	0.112	0.106	0.108	0.108667	3.7	1.85	2.09667
60mol/L	0.086	0.085	0.09	0.087	0.105	0.102	0.102	0.103	2.34333	2.09667	1.48
80mol/L	0.093	0.094	0.101	0.096	0.113	0.111	0.11	0.111333	2.46667	2.09667	1.11
100mol/L	0.085	0.091	0.091	0.089	0.102	0.102	0.106	0.103333	2.09667	1.35667	1.85
